# Supplementary material for: Genetic characterization of a Marek’s disease virus strain isolated in Japan
Source: Springer Nature journal article supplement (doi:10.1186/s12985-020-01456-1), 2020-11-23
Supplement: MOESM1 [file 18615882]

Supplementary Table 1. The *meq* genes used for the analyses in this study

|    | strain                 | country | accession No. | year (collection) | year (submission) | authors                                                                                                                                     |
|----|------------------------|---------|---------------|-------------------|-------------------|---------------------------------------------------------------------------------------------------------------------------------------------|
| 1  | CV1988                 | NLD     | AY243337.1    | -                 | 2003              | Shamblin,C.E., Greene,N., Arumugaswami,V., Dienglewicz,R.L. and Parcels,M.S.                                                                |
| 2  | GXYL1                  | CHN     | HQ290415.1    | 2005              | 2010              | Wei,P. and Zhou,X.                                                                                                                          |
| 3  | MD/HYD/18/019          | IND     | MK388089.1    | 2018              | 2019              | Kannaki,T.R., Danutha,N.R., Priyanka,E. and Radhika,P.                                                                                      |
| 4  | LYC(HLJ/06/1)          | CHN     | HQ658627.1    | 2006              | 2010              | Zhang,Y. and Liu,C.                                                                                                                         |
| 5  | LMS(SC/07/1)           | CHN     | HQ658622.1    | 2007              | 2010              | Zhang,Y. and Liu,C.                                                                                                                         |
| 6  | LHC5(LN/08/V)          | CHN     | HQ658619.1    | 2008              | 2010              | Zhang,Y. and Liu,C.                                                                                                                         |
| 7  | LHC3(LN/08/III)        | CHN     | HQ658617.1    | 2008              | 2010              | Zhang,Y. and Liu,C.                                                                                                                         |
| 8  | GaHV-2/Italy/Ck/848/17 | ITA     | MK139673.1    | 2017              | 2018              | Mescolini,G., Lupini,C., Felice,V., Guerrini,A., Silveira,F., Cecchinato,M. and Catelli,E.                                                  |
| 9  | GaHV-2/Italy/Ck/847/17 | ITA     | MK139672.1    | 2017              | 2018              | Mescolini,G., Lupini,C., Felice,V., Guerrini,A., Silveira,F., Cecchinato,M. and Catelli,E.                                                  |
| 10 | GaHV-2/Italy/Ck/810/17 | ITA     | MK139671.1    | 2017              | 2018              | Mescolini,G., Lupini,C., Felice,V., Guerrini,A., Silveira,F., Cecchinato,M. and Catelli,E.                                                  |
| 11 | GaHV-2/Italy/Ck/674/16 | ITA     | MK139667.1    | 2016              | 2018              | Mescolini,G., Lupini,C., Felice,V., Guerrini,A., Silveira,F., Cecchinato,M. and Catelli,E.                                                  |
| 12 | GaHV-2/Italy/Ck/599/16 | ITA     | MK139665.1    | 2016              | 2018              | Mescolini,G., Lupini,C., Felice,V., Guerrini,A., Silveira,F., Cecchinato,M. and Catelli,E.                                                  |
| 13 | GaHV-2/Italy/Ck/510/15 | ITA     | MK139663.1    | 2015              | 2018              | Mescolini,G., Lupini,C., Felice,V., Guerrini,A., Silveira,F., Cecchinato,M. and Catelli,E.                                                  |
| 14 | TN1014/16              | TUN     | KY113150.1    | 2016              | 2016              | Lachheb,J., Mastour,H., Turki,A., Kaboudi,K., Nsiri,J., Elbeli,I. and Ghran,A.                                                              |
| 15 | ATE                    | HUN     | AY571784.1    | -                 | 2004              | Dren,C.N., Kumar,P.M. and Parcels,M.S.                                                                                                      |
| 16 | KeralaWyd-Ct           | IND     | MK584548.1    | 2014              | 2019              | Priya,M.P. and Mangottumuruppel,M.                                                                                                          |
| 17 | Elfeil-15C             | EGY     | MH428673.1    | 2015              | 2018              | Ifeil,W.K., Abouelmaatti,R.R. and Elfeil,L.                                                                                                 |
| 18 | Elfeil-15B             | EGY     | MH428672.1    | 2015              | 2018              | Ifeil,W.K., Abouelmaatti,R.R. and Elfeil,L.                                                                                                 |
| 19 | Elfeil-15A             | EGY     | MH428671.1    | 2015              | 2018              | Ifeil,W.K., Abouelmaatti,R.R. and Elfeil,L.                                                                                                 |
| 20 | Js201801               | CHN     | MK046676.1    | 2018              | 2018              | Bai,X., Wu,Y. and Zhang,X.                                                                                                                  |
| 21 | GADVASU-M2             | IND     | KY651232.1    | 2016              | 2017              | Varte,L., Singh,A., Deka,D., Singh,S., Sharma,D., Gupta,K. and Verma,R.                                                                     |
| 22 | GADVASU-M1             | IND     | KY651231.1    | 2016              | 2017              | Varte,L., Singh,A., Deka,D., Singh,S., Sharma,D., Gupta,K. and Verma,R.                                                                     |
| 23 | B2015                  | IND     | LC195187.1    | 2015              | 2016              | Puro,K.U. and Bhattacharjee,U.                                                                                                              |
| 24 | DPR-Meq3               | IND     | KT795531.1    | 2014              | 2015              | Balena,V. and Reddy,M.R.                                                                                                                    |
| 25 | DPR-Meq2               | IND     | KT795530.1    | 2014              | 2015              | Balena,V. and Reddy,M.R.                                                                                                                    |
| 26 | ZC2014                 | CHN     | KP144356.1    | 2014              | 2014              | Zhang,K., Gong,Z., Lin,X., Wang,H., Zhang,L., Hou,G., Yu,J. and Shan,H.                                                                     |
| 27 | QD2014                 | CHN     | KP144354.1    | 2014              | 2014              | Zhang,K., Gong,Z., Li,L., Lin,X., Zhang,Q., Zhang,L., Yu,J. and Shan,H.                                                                     |
| 28 | tn-n2                  | IND     | HM749325.1    | 2010              | 2010              | Sathish,G., Kurunchi Divya,C., Parthiban,M. and Kumanan,K.                                                                                  |
| 29 | tn-n1                  | IND     | HM749324.1    | 2010              | 2010              | Sathish,G., Kurunchi Divya,C., Parthiban,M. and Kumanan,K.                                                                                  |
| 30 | UDEACO-04/13           | COL     | KU058701.1    | 2014              | 2015              | Lopez-Osorio,S., Espinal-Restrepo,M.A., Piedrahita,D., Ramirez-Nieto,G.C., Nair,V., Williams,S.M., Baigent,S.J. and Chaparro-Gutierrez,J.J. |
| 31 | UDEACO-03/14           | COL     | KU058699.1    | 2014              | 2015              | Lopez-Osorio,S., Espinal-Restrepo,M.A., Piedrahita,D., Ramirez-Nieto,G.C., Nair,V., Williams,S.M., Baigent,S.J. and Chaparro-Gutierrez,J.J. |
| 32 | UDEACO-02/14           | COL     | KU058698.1    | 2014              | 2015              | Lopez-Osorio,S., Espinal-Restrepo,M.A., Piedrahita,D., Ramirez-Nieto,G.C., Nair,V., Williams,S.M., Baigent,S.J. and Chaparro-Gutierrez,J.J. |
| 33 | UDEACO-07/13           | COL     | KU058697.1    | 2013              | 2015              | Lopez-Osorio,S., Espinal-Restrepo,M.A., Piedrahita,D., Ramirez-Nieto,G.C., Nair,V., Williams,S.M., Baigent,S.J. and Chaparro-Gutierrez,J.J. |
| 34 | 2014021                | CHN     | KU382455.1    | 2014              | 2016              | Han,C., Niu,X., Peng,W. and Zeng,X.                                                                                                         |
| 35 | 2013032                | CHN     | KU382454.1    | 2013              | 2016              | Han,C., Niu,X., Peng,W. and Zeng,X.                                                                                                         |
| 36 | QD/1311                | CHN     | KP888856.1    | 2013              | 2015              | Zhang,Y.                                                                                                                                    |
| 37 | NT/1312                | CHN     | KP888855.1    | 2013              | 2015              | Zhang,Y.                                                                                                                                    |
| 38 | ZY/1203                | CHN     | KP888842.1    | 2012              | 2015              | Zhang,Y.                                                                                                                                    |
| 39 | YC/1210                | CHN     | KP888840.1    | 2012              | 2015              | Zhang,Y.                                                                                                                                    |
| 40 | WC/1203                | CHN     | KP888839.1    | 2012              | 2015              | Zhang,Y.                                                                                                                                    |
| 41 | LTS                    | CHN     | KP888838.1    | 2012              | 2015              | Zhang,Y.                                                                                                                                    |
| 42 | GM/11                  | CHN     | KP888825.1    | 2011              | 2015              | Zhang,Y.                                                                                                                                    |
| 43 | LCC                    | CHN     | KP888815.1    | 2011              | 2015              | Zhang,Y.                                                                                                                                    |
| 44 | HW/2009                | CHN     | KP888814.1    | 2009              | 2015              | Zhang,Y.                                                                                                                                    |
| 45 | XJ03                   | CHN     | HQ638155.1    | -                 | 2010              | Tian,M. and Huang,Y.                                                                                                                        |
| 46 | J-1                    | CHN     | HQ190957.1    | -                 | 2010              | Tian,M.X., Huang,Y. and Deng,R.                                                                                                             |
| 47 | GX060167               | CHN     | EU697887.1    | 2006              | 2008              | Wei,P. and Teng,L.                                                                                                                          |
| 48 | GX14PP03               | CHN     | KX506775.1    | 2014              | 2016              | Wei,P., Wang,P.K., Zou,G.Z., Yang,Y.L. and Lin,L.L.                                                                                         |
| 49 | GX74                   | CHN     | KT229641.1    | 2014              | 2015              | Qu,S.J., Shi,K.C., Mo,S.L., Zou,L.B., Hu,J. and Yin,Y.W.                                                                                    |
| 50 | GX36                   | CHN     | KT229640.1    | 2013              | 2015              | Qu,S.J., Shi,K.C., Mo,S.L., Zou,L.B., Hu,J. and Yin,Y.W.                                                                                    |
| 51 | 3004 (vaccine)         | RUS     | EU032468.1    | -                 | 2007              | Shulpin,M.I., Kozlov,A.I., Scherbakova,L.O., Kulashbekova,S.K. and Drygin,V.V.                                                              |
| 52 | RB1B                   | USA     | HM488349.1    | -                 | 2010              | Kumar,P.M., Dong,H., Lenihan,D., Katneni,U., Shaikh,S., Gaddamanugu,S., Tavlarides-Hontz,P., Reddy,S. and Parcels,M.S.                      |
| 53 | JM102                  | USA     | HM488348.1    | -                 | 2010              | Kumar,P.M., Dong,H., Lenihan,D., Katneni,U., Shaikh,S., Gaddamanugu,S., Tavlarides-Hontz,P., Reddy,S. and Parcels,M.S.                      |
| 54 | 686                    | USA     | AY362727.1    | -                 | 2003              | Shamblin,C.E., Greene,N.M., Arumugaswami,V., Dienglewicz,R.L. and Parcels,M.S.                                                              |
| 55 | 660-A                  | USA     | AY362726.1    | -                 | 2003              | Shamblin,C.E., Greene,N.M., Arumugaswami,V., Dienglewicz,R.L. and Parcels,M.S.                                                              |
| 56 | 648A                   | USA     | AY362725.1    | -                 | 2003              | Shamblin,C.E., Greene,N.M., Arumugaswami,V., Dienglewicz,R.L. and Parcels,M.S.                                                              |
| 57 | X                      | USA     | AY362724.1    | -                 | 2003              | Shamblin,C.E., Greene,N.M., Arumugaswami,V., Dienglewicz,R.L. and Parcels,M.S.                                                              |
| 58 | W                      | USA     | AY362723.1    | -                 | 2003              | Shamblin,C.E., Greene,N.M., Arumugaswami,V., Dienglewicz,R.L. and Parcels,M.S.                                                              |
| 59 | U                      | USA     | AY362722.1    | -                 | 2003              | Shamblin,C.E., Greene,N.M., Arumugaswami,V., Dienglewicz,R.L. and Parcels,M.S.                                                              |
| 60 | TK                     | USA     | AY362721.1    | -                 | 2003              | Shamblin,C.E., Greene,N.M., Arumugaswami,V., Dienglewicz,R.L. and Parcels,M.S.                                                              |
| 61 | RL                     | USA     | AY362720.1    | -                 | 2003              | Shamblin,C.E., Greene,N.M., Arumugaswami,V., Dienglewicz,R.L. and Parcels,M.S.                                                              |
| 62 | New                    | USA     | AY362719.1    | -                 | 2003              | Shamblin,C.E., Greene,N.M., Arumugaswami,V., Dienglewicz,R.L. and Parcels,M.S.                                                              |
| 63 | N                      | USA     | AY362718.1    | -                 | 2003              | Shamblin,C.E., Greene,N.M., Arumugaswami,V., Dienglewicz,R.L. and Parcels,M.S.                                                              |
| 64 | L                      | USA     | AY362717.1    | -                 | 2003              | Shamblin,C.E., Greene,N.M., Arumugaswami,V., Dienglewicz,R.L. and Parcels,M.S.                                                              |
| 65 | 643P                   | USA     | AY362716.1    | -                 | 2003              | Shamblin,C.E., Greene,N.M., Arumugaswami,V., Dienglewicz,R.L. and Parcels,M.S.                                                              |
| 66 | 59S                    | USA     | AY362715.1    | -                 | 2003              | Shamblin,C.E., Greene,N.M., Arumugaswami,V., Dienglewicz,R.L. and Parcels,M.S.                                                              |
| 67 | 549                    | USA     | AY362714.1    | -                 | 2003              | Shamblin,C.E., Greene,N.M., Arumugaswami,V., Dienglewicz,R.L. and Parcels,M.S.                                                              |
| 68 | 637                    | USA     | AY362713.1    | -                 | 2003              | Shamblin,C.E., Greene,N.M., Arumugaswami,V., Dienglewicz,R.L. and Parcels,M.S.                                                              |
| 69 | 617A                   | USA     | AY362712.1    | -                 | 2003              | Shamblin,C.E., Greene,N.M., Arumugaswami,V., Dienglewicz,R.L. and Parcels,M.S.                                                              |
| 70 | 573                    | USA     | AY362711.1    | -                 | 2003              | Shamblin,C.E., Greene,N.M., Arumugaswami,V., Dienglewicz,R.L. and Parcels,M.S.                                                              |
| 71 | 571                    | USA     | AY362710.1    | -                 | 2003              | Shamblin,C.E., Greene,N.M., Arumugaswami,V., Dienglewicz,R.L. and Parcels,M.S.                                                              |
| 72 | 567                    | USA     | AY362709.1    | -                 | 2003              | Shamblin,C.E., Greene,N.M., Arumugaswami,V., Dienglewicz,R.L. and Parcels,M.S.                                                              |
| 73 | CU-2                   | USA     | AY362708.1    | -                 | 2003              | Shamblin,C.E., Greene,N.M., Arumugaswami,V., Dienglewicz,R.L. and Parcels,M.S.                                                              |
| 74 | BC-1                   | USA     | AY362707.1    | -                 | 2003              | Shamblin,C.E., Greene,N.M., Arumugaswami,V., Dienglewicz,R.L. and Parcels,M.S.                                                              |
| 75 | Woodlands1             | AUS     | EF523775.1    | -                 | 2007              | Renz,K.G., Cheetham,B.F. and Walkden-Brown,S.W.                                                                                             |
| 76 | MPF57                  | AUS     | EF523774.1    | -                 | 2007              | Renz,K.G., Cheetham,B.F. and Walkden-Brown,S.W.                                                                                             |
| 77 | 04CRE                  | AUS     | EF523773.1    | -                 | 2007              | Renz,K.G., Cheetham,B.F. and Walkden-Brown,S.W.                                                                                             |

|     |                        |     |                  |      |      |                                                                                            |
|-----|------------------------|-----|------------------|------|------|--------------------------------------------------------------------------------------------|
| 78  | 02LAR                  | AUS | EF523772.1       |      | 2007 | Renz,K.G., Cheetham,B.F. and Walkden-Brown,S.W.                                            |
| 79  | FT158                  | AUS | EF523771.1       |      | 2007 | Renz,K.G., Cheetham,B.F. and Walkden-Brown,S.W.                                            |
| 80  | Kgw-c2                 | JPN | LC385874.1       | 2012 | 2018 | Murata,S. and Ohashi,K.                                                                    |
| 81  | MD239                  | JPN | LC385873.1       | 1980 | 2018 | Murata,S. and Ohashi,K.                                                                    |
| 82  | Me-c1                  | JPN | LC385872.1       | 2004 | 2018 | Murata,S. and Ohashi,K.                                                                    |
| 83  | Nr-c1                  | JPN | LC385871.1       | 2004 | 2018 | Murata,S. and Ohashi,K.                                                                    |
| 84  | Sit-c1                 | JPN | LC385870.1       | 2016 | 2018 | Murata,S. and Ohashi,K.                                                                    |
| 85  | Tkc-c1                 | JPN | LC385869.1       | 2004 | 2018 | Murata,S. and Ohashi,K.                                                                    |
| 86  | Kgw-c1                 | JPN | LC385868.1       | 2010 | 2018 | Murata,S. and Ohashi,K.                                                                    |
| 87  | DPR-Meq4               | IND | KX619428.1       | 2014 | 2016 | Balena,V. and Reddy,M.R.                                                                   |
| 88  | MDV-OkIH26070-2014     | JPN | LC137001.1       | 2014 | 2016 | Nidaira,M. and Matsukawa,K.                                                                |
| 89  | LDH-3262               | IND | KF895035.1       | 2012 | 2013 | Gupta,M., Deka,D. and Verma,R.                                                             |
| 90  | LDH-1758               | IND | KF895029.1       | 2012 | 2013 | Gupta,M., Deka,D. and Verma,R.                                                             |
| 91  | Iraq95E                | IRQ | KC243270.1       | 2010 | 2012 | Wajid,S.J.                                                                                 |
| 92  | Iraq52C                | IRQ | KC243267.1       | 2010 | 2012 | Wajid,S.J.                                                                                 |
| 93  | Iraq3A                 | IRQ | KC243262.1       | 2010 | 2012 | Wajid,S.J.                                                                                 |
| 94  | TN 1013/16             | TUN | MK041219.1       | 2016 | 2018 | Lachheb,J. and Nsiri,J.                                                                    |
| 95  | GaHV-2/Italy/Ck/850/17 | ITA | MK139674.1       | 2017 | 2018 | Mescolini,G., Lupini,C., Felice,V., Guerrini,A., Silveira,F., Cecchinato,M. and Catelli,E. |
| 96  | Kgs-c1                 | JPN | Shown in Table 1 |      |      |                                                                                            |
| 97  | 814                    | CHN | Shown in Table 1 |      |      |                                                                                            |
| 98  | CC/1409                | CHN | Shown in Table 1 |      |      |                                                                                            |
| 99  | ATE2539                | HUN | Shown in Table 1 |      |      |                                                                                            |
| 100 | EU-1                   | ISR | Shown in Table 1 |      |      |                                                                                            |
| 101 | GA                     | USA | Shown in Table 1 |      |      |                                                                                            |
| 102 | GX0101                 | CHN | Shown in Table 1 |      |      |                                                                                            |
| 103 | HNGS0101               | CHN | Shown in Table 1 |      |      |                                                                                            |
| 104 | HNLC503                | CHN | Shown in Table 1 |      |      |                                                                                            |
| 105 | HS/1412                | CHN | Shown in Table 1 |      |      |                                                                                            |
| 106 | JL/1404                | CHN | Shown in Table 1 |      |      |                                                                                            |
| 107 | LCY                    | CHN | Shown in Table 1 |      |      |                                                                                            |
| 108 | Md5                    | USA | Shown in Table 1 |      |      |                                                                                            |
| 109 | Md11                   | USA | Shown in Table 1 |      |      |                                                                                            |
| 110 | MD70/13                | HUN | Shown in Table 1 |      |      |                                                                                            |
| 111 | C12:130                | GBR | Shown in Table 1 |      |      |                                                                                            |
| 112 | Polen5                 | POL | Shown in Table 1 |      |      |                                                                                            |
